# Supplementary material
Source: publisher figshare collection journal article supplement (https://sage.figshare.com/ndownloader/files/36009500)
Supplement: Supplementary file 1 [file 36009500]

| **Sex: Male** | | **Total Instances Observed** | | | **Incidence Range** | | |
| --- | --- | --- | --- | --- | --- | --- | --- |
| **Tissue** | **Observation** | **Cambodian** | **Chinese** | **Vietnamese** | **Cambodian** | **Chinese** | **Vietnamese** |
| Bone Marrow | Cellularity Increased, Lymphoid | - | 4 (0.62%), N=648 | - | - | [0-50.00%] | - |
| Cellularity, Decreased | - | 3 (0.46%), N=648 | - | - | [0-50.00%] | - |
| Fibrosis | - | 1 (0.15%), N=648 | - | - | [0-20.00%] | - |
| Hyperplasia (Lymphoid) | 1 (0.42%), N=240 | 12c* (1.85%), N=648 | 6c* (5.5%), N=109 | [0-16.67%] | [0-50.00%] | [0-40.00%] |
| Infiltrate, (Mononuclear Cell) | 1 (0.42%), N=240 | 1 (0.15%), N=648 | 1 (0.92%), N=109 | [0-20.00%] | [0-10.00%] | [0-20.00%] |
| Lymph Node, Mandibular | Cellularity Decreased, Lymphoid | 1 (0.42%), N=236 | - | - | [0-20.00%] | - | - |
| Erythrocytosis/Erythrophagocytosis | 1 (0.42%), N=236 | 3 (0.5%), N=605 | - | [0-20.00%] | [0-20.00%] | - |
| Extramedullary Hematopoiesis | 1 (0.42%), N=236 | 2 (0.33%), N=605 | - | [0-20.00%] | [0-25.00%] | - |
| Hemorrhage | - | 1 (0.17%), N=605 | - | - | [0-16.67%] | - |
| Histiocytosis | - | 2 (0.33%), N=605 | - | - | [0-25.00%] | - |
| Infiltrate, (Eosinophils) | - | - | 1 (1%), N=100 | - | - | [0-11.11%] |
| Inflammation | - | 6 (0.99%), N=605 | - | - | [0-33.33%] | - |
| Lymphocytes, Increased | 8 (3.39%), N=236 | 17 (2.81%), N=605 | 7 (7%), N=100 | [0-80.00%] | [0-66.67%] | [0-100.00%] |
| Pigment | - | 1 (0.17%), N=605 | - | - | [0-20.00%] | - |
| Lymph Node, Mesenteric | Cellularity Decreased, Lymphoid | 1 (0.41%), N=241 | 2 (0.32%), N=628 | - | [0-20.00%] | [0-16.67%] | - |
| Dilatation | - | 1 (0.16%), N=628 | - | - | [0-20.00%] | - |
| Erythrocytosis/Erythrophagocytosis | - | - | 1 (1.02%), N=98 | - | - | [0-16.67%] |
| Granuloma | - | 1 (0.16%), N=628 | - | - | [0-16.67%] | - |
| Histiocytosis | 5 (2.07%), N=241 | 9 (1.43%), N=628 | - | [0-33.33%] | [0-75.00%] | - |
| Hypertrophy | - | 1 (0.16%), N=628 | - | - | [0-25.00%] | - |
| Infiltrate, (Eosinophils) | 2 (0.83%), N=241 | 7 (1.11%), N=628 | 3 (3.06%), N=98 | [0-22.22%] | [0-33.33%] | [0-33.33%] |
| Infiltrate, (Mononuclear Cell) | 5 (2.07%), N=241 | 6 (0.96%), N=628 | 4 (4.08%), N=98 | [0-40.00%] | [0-40.00%] | [0-80.00%] |
| Pigment | - | 1 (0.16%), N=628 | - | - | [0-10.00%] | - |
| Spleen | Accumulation | - | 6 (0.91%), N=662 | - | - | [0-100.00%] | - |
| Anomaly (Developmental) | - | 1 (0.15%), N=662 | - | - | [0-16.67%] | - |
| Cellularity Decreased, Lymphoid | 3 (1.21%), N=248 | 23 (3.47%), N=662 | - | [0-20.00%] | [0-66.67%] | - |
| Cellularity Increased, Lymphoid | - | 1 (0.15%), N=662 | - | - | [0-20.00%] | - |
| Fibrosis | 1 (0.4%), N=248 | 9 (1.36%), N=662 | 1 (0.96%), N=104 | [0-20.00%] | [0-50.00%] | [0-16.67%] |
| Granuloma | - | 2 (0.3%), N=662 | - | - | [0-20.00%] | - |
| Infiltrate, (Mononuclear Cell) | 23 (9.27%), N=248 | 74 (11.18%), N=662 | 15 (14.42%), N=104 | [0-100.00%] | [0-100.00%] | [0-80.00%] |
| Macrophages | 1 (0.4%), N=248 | 6 (0.91%), N=662 | - | [0-16.67%] | [0-50.00%] | - |
| Pigment | - | 1 (0.15%), N=662 | - | - | [0-25.00%] | - |
| Red Pulp Depletion | - | 2 (0.3%), N=662 | - | - | [0-50.00%] | - |
| Vacuolation (Focal) | - | 1 (0.15%), N=662 | - | - | [0-16.67%] | - |
| Thymus | Anomaly (Developmental) | 1 (0.39%), N=256 | - | - | [0-16.67%] | - | - |
| Cellularity Decreased,  Lymphoid | 10a**, b** (3.91%), N=256 | 101a**, c** (14.55%), N=694 | 23b**, c** (22.33%), N=103 | [0-100.00%] | [0-100.00%] | [0-100.00%] |
| Congestion | - | 1 (0.14%), N=694 | - | - | [0-16.67%] | - |
| Cyst | 10 (3.91%), N=256 | 39 (5.62%), N=694 | 2 (1.94%), N=103 | [0-66.67%] | [0-100.00%] | [0-20.00%] |
| Hemorrhage | 1 (0.39%), N=256 | 1 (0.14%), N=694 | - | [0-20.00%] | [0-20.00%] | - |
| Necrosis (Lymphoid) | - | 2 (0.29%), N=694 | - | - | [0-20.00%] | - |

| **Sex: Female** | | **Total Instances Observed** | | | **Incidence Range** | | |
| --- | --- | --- | --- | --- | --- | --- | --- |
| **Tissue** | **Observation** | **Cambodian** | **Chinese** | **Vietnamese** | **Cambodian** | **Chinese** | **Vietnamese** |
| Bone Marrow | Cellularity Increased, Lymphoid | - | 4 (0.63%), N=640 | - | - | [0-25.00%] | - |
| Cellularity, Decreased | 1 (0.43%), N=233 | 1 (0.16%), N=640 | - | [0-100.00%] | [0-25.00%] | - |
| Hyperplasia (Lymphoid) | 4 (1.72%), N=233 | 16 (2.5%), N=640 | - | [0-33.33%] | [0-100.00%] | - |
| Inclusion | - | 1 (0.16%), N=640 | - | - | [0-33.33%] | - |
| Infiltrate, (Mononuclear Cell) | 1 (0.43%), N=233 | - | 1 (0.97%), N=103 | [0-20.00%] | - | [0-16.67%] |
| Pigment | - | 1 (0.16%), N=640 | - | - | [0-25.00%] | - |
| Lymph Node, Mandibular | Cellularity Decreased, Lymphoid | - | 3 (0.5%), N=605 | 1 (1.01%), N=99 | - | [0-25.00%] | [0-20.00%] |
| Erythrocytosis/Erythrophagocytosis | - | 1 (0.17%), N=605 | 1 (1.01%), N=99 | - | [0-20.00%] | [0-25.00%] |
| Extramedullary Hematopoiesis | 1 (0.44%), N=226 | 6 (0.99%), N=605 | 1 (1.01%), N=99 | [0-25.00%] | [0-75.00%] | [0-20.00%] |
| Hemorrhage | - | 1 (0.17%), N=605 | - | - | [0-14.29%] | - |
| Histiocytosis | - | 4 (0.66%), N=605 | - | - | [0-40.00%] | - |
| Inflammation | 3 (1.33%), N=226 | 8 (1.32%), N=605 | 1 (1.01%), N=99 | [0-25.00%] | [0-25.00%] | [0-11.11%] |
| Lymphocytes, Increased | - | 17 (2.81%), N=605 | 5 (5.05%), N=99 | - | [0-50.00%] | [0-100.00%] |
| Pigment | - | 1 (0.17%), N=605 | - | - | [0-20.00%] | - |
| Lymph Node, Mesenteric | Cellularity Decreased, Lymphoid | - | 3 (0.48%), N=622 | - | - | [0-25.00%] | - |
| Erythrocytosis/Erythrophagocytosis | 2 (0.87%), N=230 | - | - | [0-20.00%] | - | - |
| Histiocytosis | - | 8 (1.29%), N=622 | 1 (1.02%), N=98 | - | [0-50.00%] | [0-20.00%] |
| Infiltrate, (Eosinophils) | - | 3 (0.48%), N=622 | 2 (2.04%), N=98 | - | [0-33.33%] | [0-22.22%] |
| Infiltrate, (Mononuclear Cell) | 2 (0.87%), N=230 | 6 (0.96%), N=622 | 4 (4.08%), N=98 | [0-33.33%] | [0-33.33%] | [0-80.00%] |
| Mineralization | 1 (0.43%), N=230 | 1 (0.16%), N=622 | - | [0-33.33%] | [0-20.00%] | - |
| Pigment | - | 2 (0.32%), N=622 | - | - | [0-20.00%] | - |
| Spleen | Accumulation | - | 6 (0.91%), N=658 | - | - | [0-100.00%] | - |
| Cellularity Decreased, Lymphoid | 6 (2.53%), N=237 | 21 (3.19%), N=658 | 6 (5.71%), N=105 | [0-50.00%] | [0-75.00%] | [0-55.56%] |
| Cellularity Increased, Lymphoid | - | 1 (0.15%), N=658 | - | - | [0-16.67%] | - |
| Fibrosis | 1 (0.42%), N=237 | 9 (1.37%), N=658 | - | [0-16.67%] | [0-33.33%] | - |
| Infiltrate, (Mononuclear Cell) | 11a*, b* (4.64%), N=237 | 59a* (8.97%), N=658 | 8b* (7.62%), N=105 | [0-66.67%] | [0-66.67%] | [0-80.00%] |
| Inflammation | - | 2 (0.3%), N=658 | - | - | [0-16.67%] | - |
| Macrophages | - | 2 (0.3%), N=658 | - | - | [0-20.00%] | - |
| Pigment | - | 3 (0.46%), N=658 | - | - | [0-20.00%] | - |
| Red Pulp Depletion | - | 1 (0.15%), N=658 | - | - | [0-33.33%] | - |
| Thymus | Accumulation | - | 1 (0.14%), N=694 | - | - | [0-33.33%] | - |
| Cellularity Decreased, Lymphoid | 20a**, b** (8.1%), N=247 | 168a**, c** (24.21%), N=694 | 32b**, c** (30.77%), N=104 | [0-100.00%] | [0-100.00%] | [0-100.00%] |
| Cyst | 10 (4.05%), N=247 | 44 (6.34%), N=694 | 5 (4.81%), N=104 | [0-50.00%] | [0-100.00%] | [0-40.00%] |
| Hemorrhage | 2 (0.81%), N=247 | - | - | [0-20.00%] | - | - |
| Histiocytosis | - | 1 (0.14%), N=694 | - | - | [0-16.67%] | - |
| Infiltrate, (Mononuclear Cell) | 1 (0.4%), N=247 | - | - | [0-16.67%] | - | - |
| Mineralization | 1 (0.4%), N=247 | 1 (0.14%), N=694 | - | [0-33.33%] | [0-16.67%] | - |
